# Supplementary material
Source: PubMed Central journal article supplement (PMC3129684)

*crt*<sup>-/-</sup>

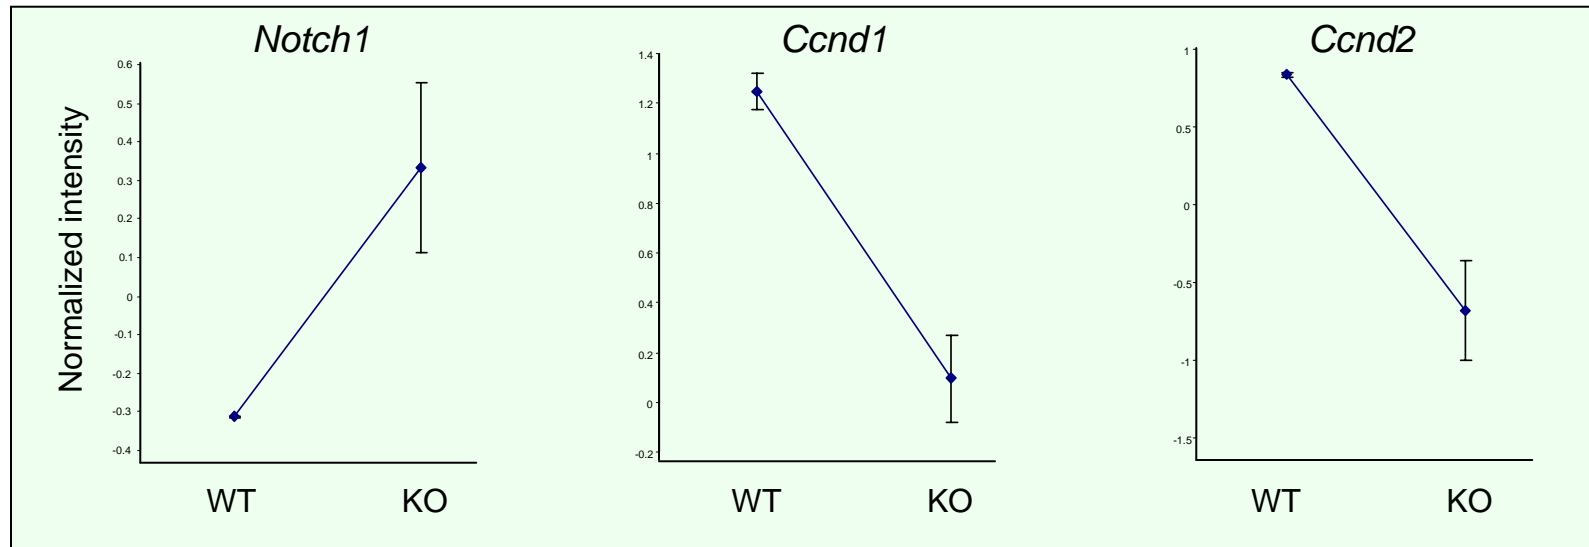

*Hdac1*<sup>-/-</sup>

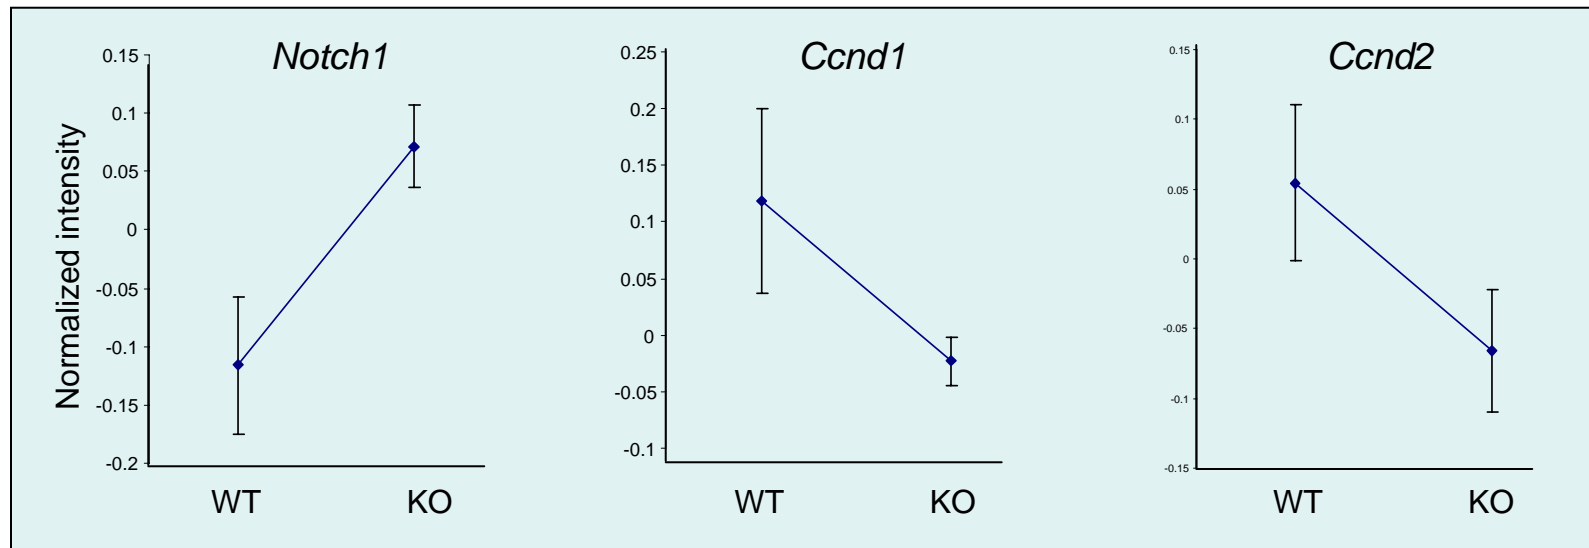

Supplemental Figure 1

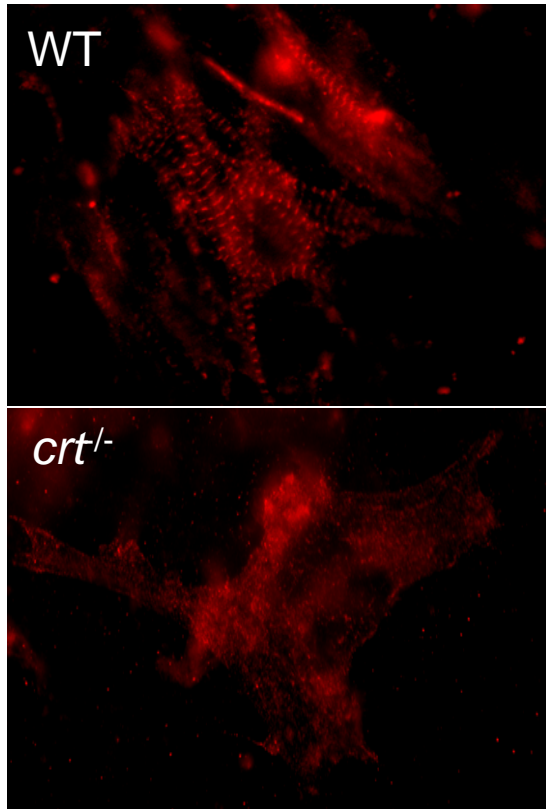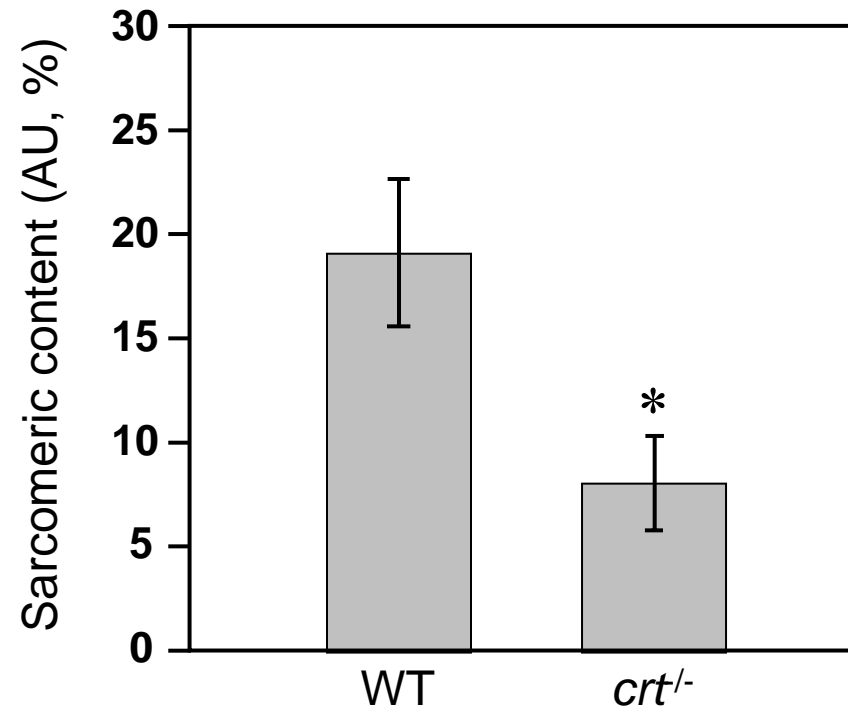

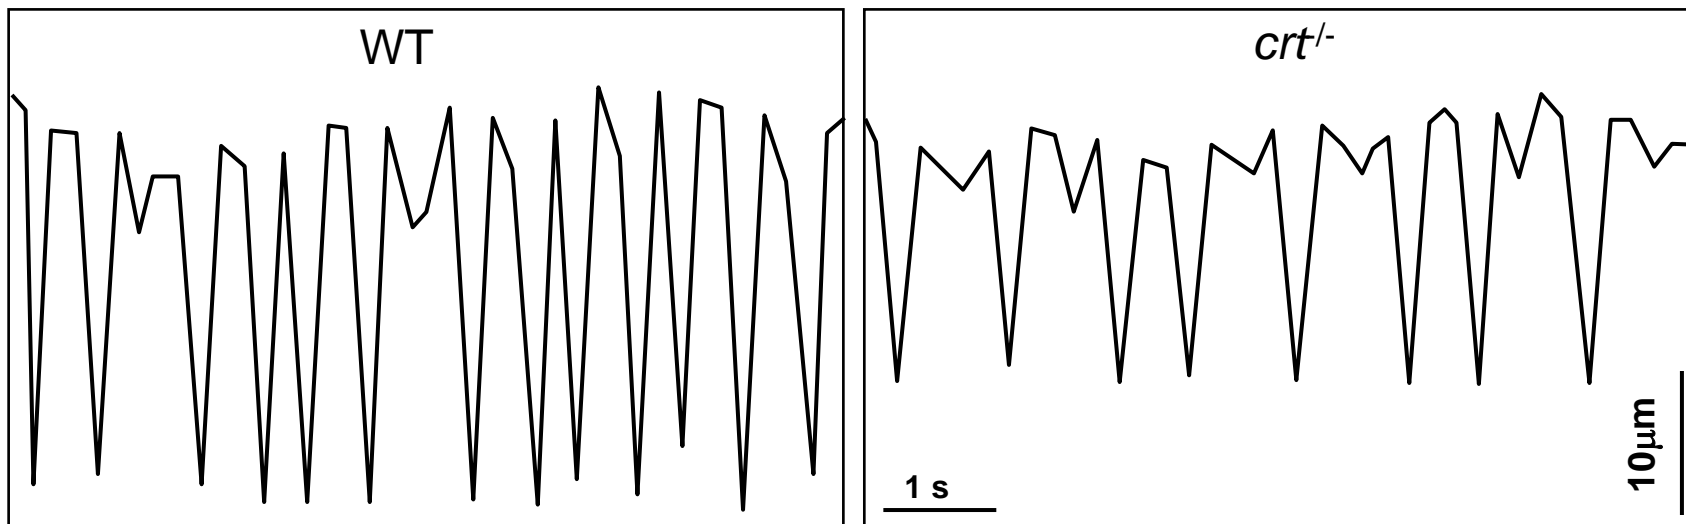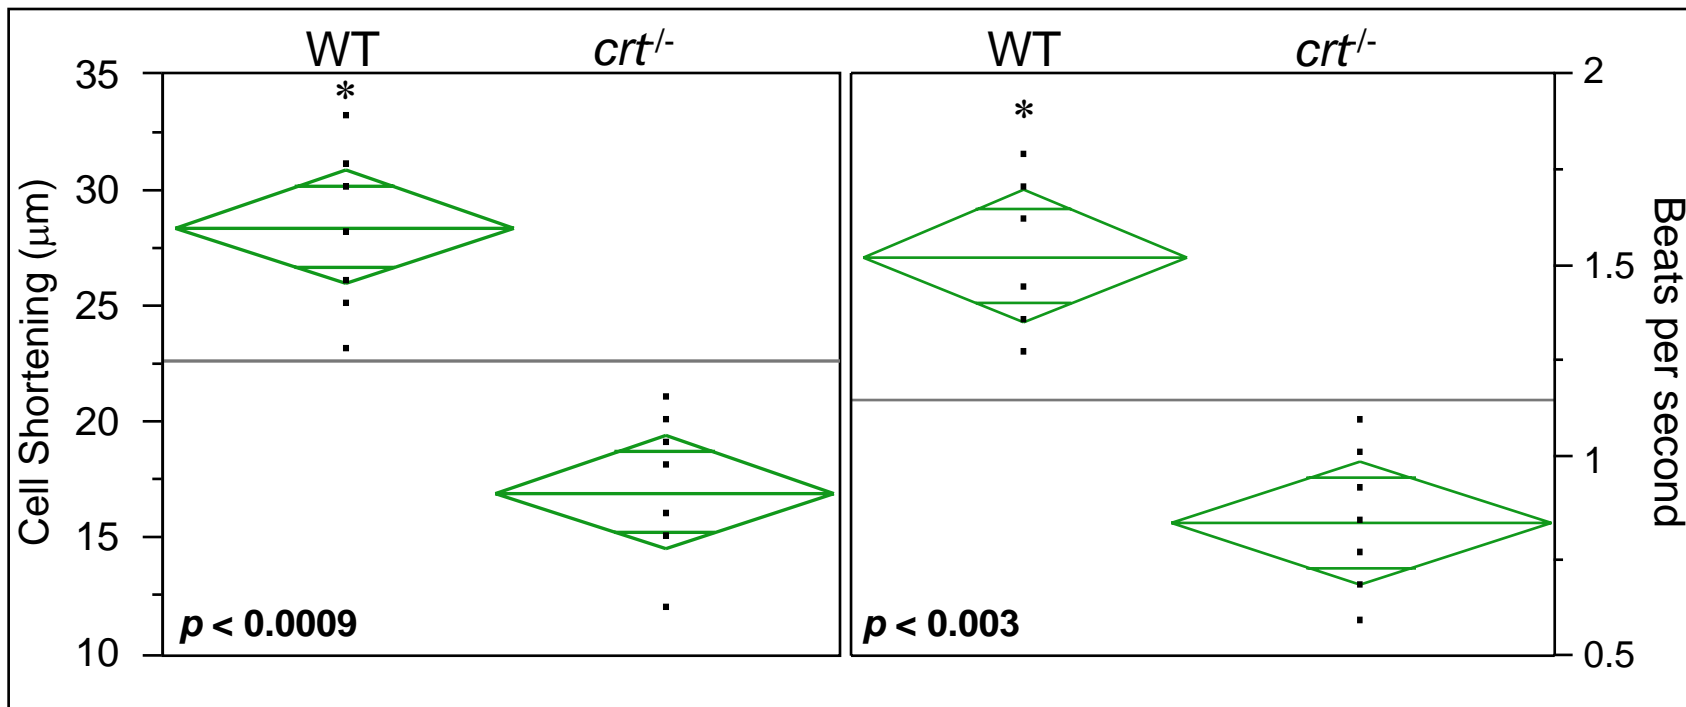

Supplemental Figure 3

Supplement: NIHMS301851-supplement-Supplementary_Figures.pdf [file NIHMS301851-supplement-Supplementary_Figures.pdf]
